# Supplementary material for: Correcting for non-participation bias in health surveys using record-linkage, synthetic observations and pattern mixture modelling
Source: Stat Methods Med Res. 2019 Jun 11;29(4):1212–26. doi: 10.1177/0962280219854482 (PMC7188518; doi:10.1177/0962280219854482)
Supplement: Supplementary material [file Supplemental_Material.pdf]

**Supplemental Table 1.** International Classification of Disease Classification Codes**Alcohol-related hospital episodes***Prior to 01/04/1996*

|                                    |                                                                                                                                                                                                                                                                                                                                                                                                                                                                                                                                                                                                                                                                                                                                                                                                                                                                                                                                                                                                                                                                                                                                                                                                                                                                                                                                                                                                                                                                                                                                                                                                                                                                                                                                                                                                                                                                                                                                                                                                                                                                                                                                                                                                                                                     |
|------------------------------------|-----------------------------------------------------------------------------------------------------------------------------------------------------------------------------------------------------------------------------------------------------------------------------------------------------------------------------------------------------------------------------------------------------------------------------------------------------------------------------------------------------------------------------------------------------------------------------------------------------------------------------------------------------------------------------------------------------------------------------------------------------------------------------------------------------------------------------------------------------------------------------------------------------------------------------------------------------------------------------------------------------------------------------------------------------------------------------------------------------------------------------------------------------------------------------------------------------------------------------------------------------------------------------------------------------------------------------------------------------------------------------------------------------------------------------------------------------------------------------------------------------------------------------------------------------------------------------------------------------------------------------------------------------------------------------------------------------------------------------------------------------------------------------------------------------------------------------------------------------------------------------------------------------------------------------------------------------------------------------------------------------------------------------------------------------------------------------------------------------------------------------------------------------------------------------------------------------------------------------------------------------|
| ICD-9 codes<br>(hospital episodes) | 2651 (other and unspecified manifestations of thiamine deficiency);<br>3039 (alcohol dependence syndrome);<br>3050 (nondependent abuse of alcohol);<br>2918 (other specified alcoholic psychoses);<br>2910 (delirium tremens);<br>2913 (other alcoholic hallucinosis);<br>2915 (alcoholic jealousy);<br>2919 (alcoholic psychoses, unspecified);<br>2911 (korsakov's psychosis, alcoholic);<br>2912 (other alcoholic dementia);<br>3575 (alcoholic polyneuropathy);<br>4255 (alcoholic cardiomyopathy);<br>5353 (alcoholic gastritis);<br>5710 (alcoholic fatty liver);<br>5711 (acute alcoholic hepatitis);<br>5712 (alcoholic cirrhosis of liver);<br>5713 (alcoholic liver damage, unspecified);<br>7607 (fetus/newborn aff. by noxious influences trans. by<br>placenta/breast milk);<br>7598 (other specified anomalies);<br>7903 (excessive blood level of alcohol);<br>9800 (toxic effect of ethyl alcohol);<br>9801 (toxic effect of isopropyl alcohol);<br>9809 (toxic effect of unspecified alcohol);<br>E860 (accidental poisoning by alcohol, not elsewhere classified);<br>V57 (care involving use of rehabilitation procedures);<br>E9473 (adverse effects in therapeutic use of alcohol deterrents);<br>E9509 (suicide and s.i. poisoning by other/unspec. solid and liquid<br>substances);<br>E9809 (poisoning undet. acc./purp. by other/unspec. solid and liquid<br>substances);<br>E8600* (accidental poisoning by alcoholic beverages);<br>E8601* (acc. pois. other/unspec. ethyl alcohol);<br>E8609* (accidental poisoning by unspecified alcohol);<br>E9509* (suicide and s.i. poisoning by other/unspec. solid and liquid<br>substances);<br>5711 <sup>§</sup> (acute alcoholic hepatitis);<br>6554 <sup>§</sup> (suspected damage to fetus from other disease in the mother);<br>2550 <sup>§</sup> (cushing's syndrome);<br>3594 <sup>§</sup> (toxic myopathy);<br>5709 <sup>§</sup> (acute and subacute necrosis of liver);<br>3483 <sup>§</sup> (encephalopathy, unspecified);<br>D3039+A3317 <sup>a</sup> (alcohol dependence syndrome+cerebral<br>degeneration in other diseases classified elsewhere); D3039+A3344 <sup>a</sup><br>(alcohol dependence syndrome+cerebellar ataxia in disease classified<br>elsewhere). |
|------------------------------------|-----------------------------------------------------------------------------------------------------------------------------------------------------------------------------------------------------------------------------------------------------------------------------------------------------------------------------------------------------------------------------------------------------------------------------------------------------------------------------------------------------------------------------------------------------------------------------------------------------------------------------------------------------------------------------------------------------------------------------------------------------------------------------------------------------------------------------------------------------------------------------------------------------------------------------------------------------------------------------------------------------------------------------------------------------------------------------------------------------------------------------------------------------------------------------------------------------------------------------------------------------------------------------------------------------------------------------------------------------------------------------------------------------------------------------------------------------------------------------------------------------------------------------------------------------------------------------------------------------------------------------------------------------------------------------------------------------------------------------------------------------------------------------------------------------------------------------------------------------------------------------------------------------------------------------------------------------------------------------------------------------------------------------------------------------------------------------------------------------------------------------------------------------------------------------------------------------------------------------------------------------|

*01/04/1996 onward*

|                                     |                                                                                                                                                                                                                                                                                                                                                                                                                                                                                                                                                                                                                                                                                                                                                                                                                                                                                                                                                                                                                                                                                                                                                                                                                                                                                                    |
|-------------------------------------|----------------------------------------------------------------------------------------------------------------------------------------------------------------------------------------------------------------------------------------------------------------------------------------------------------------------------------------------------------------------------------------------------------------------------------------------------------------------------------------------------------------------------------------------------------------------------------------------------------------------------------------------------------------------------------------------------------------------------------------------------------------------------------------------------------------------------------------------------------------------------------------------------------------------------------------------------------------------------------------------------------------------------------------------------------------------------------------------------------------------------------------------------------------------------------------------------------------------------------------------------------------------------------------------------|
| ICD-10 codes<br>(hospital episodes) | F10 (Mental & behavioural disorders due to use of alcohol); K70<br>(Alcoholic liver disease);<br>X45 (Accidental poisoning by and exposure to alcohol);<br>X65 (Intentional self-poisoning by and exposure to alcohol);<br>Y15 (Poisoning by and exposure to alcohol undetermined intent);<br>Y90 (Evidence of alcohol involvement determined by blood alcohol<br>level);<br>Y91 (Evidence of alcohol involvement determined by level<br>intoxication);<br>E244 (alcohol induced Pseudo-Cushing's syndrome);<br>E512 (Wernicke's Encephalopathy);<br>G312 (Degeneration of nervous system due to alcohol);<br>G621 (Alcoholic polyneuropathy);<br>G721 (Alcoholic myopathy);<br>I426 (Alcoholic cardiomyopathy);<br>K292 (Alcoholic gastritis);<br>K860 (Alcohol-induced chronic pancreatitis);<br>O354 (Maternal care for (suspected) damage to foetus from alcohol);<br>P043 (Foetus and newborn affected by maternal use of alcohol);<br>Q860 (Fetal alcohol syndrome (dysmorphic));<br>R780 (Finding of alcohol in blood);<br>T510 (Toxic effect of ethanol);<br>T511 (Toxic effect of methanol);<br>T519 (Toxic effect of alcohol; unspecified);<br>Y573 (Alcohol deterrents);<br>Z502 (Alcohol rehabilitation);<br>Z714 (Alcohol abuse counselling and surveillance);<br>Z721 (Alcohol Use). |
|-------------------------------------|----------------------------------------------------------------------------------------------------------------------------------------------------------------------------------------------------------------------------------------------------------------------------------------------------------------------------------------------------------------------------------------------------------------------------------------------------------------------------------------------------------------------------------------------------------------------------------------------------------------------------------------------------------------------------------------------------------------------------------------------------------------------------------------------------------------------------------------------------------------------------------------------------------------------------------------------------------------------------------------------------------------------------------------------------------------------------------------------------------------------------------------------------------------------------------------------------------------------------------------------------------------------------------------------------|

---

#### **Alcohol-related deaths**

*Prior to 01/01/2000*

|                                        |                                                                                                                                                                                                                                                                                                                                                                                                                                                                                                                                                                                                   |
|----------------------------------------|---------------------------------------------------------------------------------------------------------------------------------------------------------------------------------------------------------------------------------------------------------------------------------------------------------------------------------------------------------------------------------------------------------------------------------------------------------------------------------------------------------------------------------------------------------------------------------------------------|
| ICD-9 codes (deaths<br>-primary cause) | 4255 (alcoholic cardiomyopathy);<br>5710 (alcoholic fatty liver);<br>5711 (acute alcoholic hepatitis);<br>5712 (alcoholic cirrhosis of liver);<br>5713 (alcoholic liver damage; unspecified);<br>5714 (chronic hepatitis);<br>5715 (cirrhosis of liver without mention of alcohol);<br>5718 (other chronic nonalcoholic liver disease);<br>5719 (unspecified chronic liver disease without mention of alcohol);<br>E860 (accidental poisoning by alcohol; not elsewhere classified);<br>291 (alcoholic psychoses);<br>303 (alcohol dependence syndrome);<br>305 (non-dependent abuse of alcohol). |
|----------------------------------------|---------------------------------------------------------------------------------------------------------------------------------------------------------------------------------------------------------------------------------------------------------------------------------------------------------------------------------------------------------------------------------------------------------------------------------------------------------------------------------------------------------------------------------------------------------------------------------------------------|

*01/01/2000 onward*

|                                           |                                                                                                                                                                                                                                                                                                                                                                                                                                                                                 |
|-------------------------------------------|---------------------------------------------------------------------------------------------------------------------------------------------------------------------------------------------------------------------------------------------------------------------------------------------------------------------------------------------------------------------------------------------------------------------------------------------------------------------------------|
| ICD-10 codes<br>(deaths-primary<br>cause) | F10 (Mental & behavioural disorders due to use of alcohol); K70<br>(Alcoholic liver disease);<br>K73 (Chronic hepatitis; not elsewhere classified);<br>X45 (Accidental poisoning by and exposure to alcohol);<br>X65 (Intentional self-poisoning by and exposure to alcohol); Y15<br>(Poisoning by and exposure to alcohol; undetermined intent);<br>G312 (Degeneration of nervous system due to alcohol);<br>G621 (Alcoholic polyneuropathy); I426 (Alcoholic cardiomyopathy); |
|-------------------------------------------|---------------------------------------------------------------------------------------------------------------------------------------------------------------------------------------------------------------------------------------------------------------------------------------------------------------------------------------------------------------------------------------------------------------------------------------------------------------------------------|

---

K292 (Alcoholic gastritis);  
K740 (Hepatic fibrosis);  
K741 (Hepatic sclerosis);  
K742 (Hepatic fibrosis with hepatitic sclerosis); K746 (Other and  
unspecified cirrhosis of liver);  
K860 (Alcohol induced chronic pancreatitis).

---

The ICD-codes here follow those used by Information Services Division NHS National Services Scotland and the National Records of Scotland at the time of data acquisition, for alcohol-related hospital episodes and alcohol-related deaths respectively.

Any pair of an *external alcohol code*<sup>a</sup> and *external code*<sup>a</sup> constitutes an alcohol-related episode.

<sup>a</sup>Combination of these codes in consecutive diagnoses listed constitutes an alcohol-related episode.
